# Supplementary material for: A facile preparation of palladium nanoparticles supported on magnetite/s-graphene and their catalytic application in Suzuki–Miyaura reaction
Source: Royal Society of Chemistry journal article supplement (doi:10.1039/c2cy20263h), 2012-01-01

<sup>1</sup>H NMR data of the products:

4'-methyl-4-phenylanisole (**3a**): <sup>1</sup>H NMR (400 MHz, CDCl<sub>3</sub>): δ 2.41 (3H, s, CH<sub>3</sub>), 3.87 (3H, s, OCH<sub>3</sub>), 6.99 (2H, d, *J* = 8.7 Hz, ArH), 7.25 (2H, d, *J* = 8.0 Hz, ArH), 7.47 (2H, d, *J* = 8.0 Hz, ArH), 7.54 (2H, d, *J* = 8.7 Hz, ArH).

4-phenylanisole (**3b**): <sup>1</sup>H NMR (400 MHz, CDCl<sub>3</sub>): δ 3.88 (3H, s, OCH<sub>3</sub>), 7.00 (2H, d, *J* = 8.4 Hz, ArH), 7.33-7.34 (1H, m, ArH), 7.44 (2H, t, *J* = 7.6 Hz, ArH), 7.54-7.59 (4H, m, ArH).

4, 4'-dimethoxybiphenyl (**3c**): <sup>1</sup>H NMR (400 MHz, CDCl<sub>3</sub>): δ 3.87 (6H, s, OCH<sub>3</sub>), 6.98 (4H, d, *J* = 8.3 Hz, ArH), 7.50 (4H, d, *J* = 8.3 Hz, ArH).

4-phenylanisole (**3d**): <sup>1</sup>H-NMR (400 MHz, CDCl<sub>3</sub>): δ 3.87 (3H, s, OCH<sub>3</sub>), 6.99 (2H, d, *J* = 8.5 Hz, ArH), 7.28-7.34 (1H, m, ArH), 7.43 (2H, t, *J* = 7.7 Hz, ArH), 7.45-7.58 (4H, m, ArH).

4-methoxy-4'-nitrobiphenyl (**3e**): <sup>1</sup>H NMR (400 MHz, CDCl<sub>3</sub>): δ 3.90 (3H, s, OCH<sub>3</sub>), 7.04 (2H, d, *J* = 8.7 Hz, ArH), 7.61 (2H, d, *J* = 8.8 Hz, ArH), 7.72 (2H, d, *J* = 8.8 Hz, ArH), 8.30 (2H, d, *J* = 8.7 Hz, ArH).

4-nitrobiphenyl (**3f**): <sup>1</sup>H NMR (400 MHz, CDCl<sub>3</sub>): δ 7.46-7.54 (3H, m, ArH), 7.66 (2H, d, *J* = 7.9 Hz, ArH), 7.76 (2H, d, *J* = 8.6 Hz, ArH), 8.32 (2H, d, *J* = 8.6 Hz, ArH).

4-methoxy-4'-acetylbiphenyl (**3g**): <sup>1</sup>H NMR (400 MHz, CDCl<sub>3</sub>): δ 2.65 (3H, s, COCH<sub>3</sub>), 3.89 (3H, s, OCH<sub>3</sub>), 7.03 (2H, d, *J* = 8.4 Hz, ArH), 7.61 (2H, d, *J* = 8.4 Hz, ArH), 7.67 (2H, d, *J* = 8.0 Hz, ArH), 8.03 (2H, d, *J* = 8.0 Hz, ArH).

4-Acetylbiphenyl (**3h**): <sup>1</sup>H NMR (400 MHz, CDCl<sub>3</sub>): δ 2.67 (3H, s, COCH<sub>3</sub>), 7.43-7.45 (1H, m, ArH), 7.48-7.52 (2H, m, ArH), 7.66 (2H, d, *J* = 7.6 Hz, ArH), 7.72 (2H, d, *J* = 8.1 Hz, ArH), 8.06(2H, d, *J* = 8.1 Hz, ArH).

3-phenylanisole (**3i**): <sup>1</sup>H NMR (400 MHz, CDCl<sub>3</sub>): δ 3.92 (3H, s, OCH<sub>3</sub>), 6.98 (1H, d, *J* = 8.0 Hz, ArH), 7.21 (1H, s, ArH), 7.26 (1H, d, *J* = 8.0 Hz, ArH), 7.40-7.44 (2H, m, ArH), 7.48-7.52 (2H, m, ArH), 7.66 (2H, d, *J* = 7.7 Hz, Ar).

3-methylbiphenyl (**3j**): <sup>1</sup>H NMR (400 MHz, CDCl<sub>3</sub>): δ 2.50 (3H, s, CH<sub>3</sub>), 7.25 (1H, d, *J* = 7.4 Hz, ArH), 7.39-7.43 (2H, m, ArH), 7.49-7.53 (4H, m, ArH), 7.70 (2H, d, *J* = 7.3 Hz, ArH).

4'-methyl-3-phenylanisole (**3k**): <sup>1</sup>H NMR (400 MHz, CDCl<sub>3</sub>): δ 2.43 (3H, s, CH<sub>3</sub>), 3.90 (3H, s, OCH<sub>3</sub>), 6.91(1H, d, *J* = 8.1 Hz, ArH), 7.15(1H, s, ArH), 7.21(1H, d, *J* = 8.0 Hz, ArH), 7.28 (2H, d, *J* = 8.0 Hz, ArH), 7.36-7.40 (1H, m, ArH), 7.53 (2H, d, *J* = 8.0 Hz, ArH).

2, 4'-bimethylbiphenyl (**3l**):  $^1\text{H}$  NMR (400 MHz,  $\text{CDCl}_3$ ):  $\delta$  2.43 (3H, s,  $\text{CH}_3$ ), 2.55 (3H, s,  $\text{CH}_3$ ), 7.37-7.40 (8H, m, ArH).

4-methylbiphenyl (**3m**):  $^1\text{H}$  NMR (400 MHz,  $\text{CDCl}_3$ ):  $\delta$  2.44 (3H, s,  $\text{CH}_3$ ), 7.29 (2H, d,  $J = 8.0$  Hz, ArH), 7.36 (1H, m, ArH), 7.47 (2H, m, ArH), 7.54 (2H, d,  $J = 8.0$  Hz, ArH), 7.62 (2H, d,  $J = 7.7$  Hz, ArH).

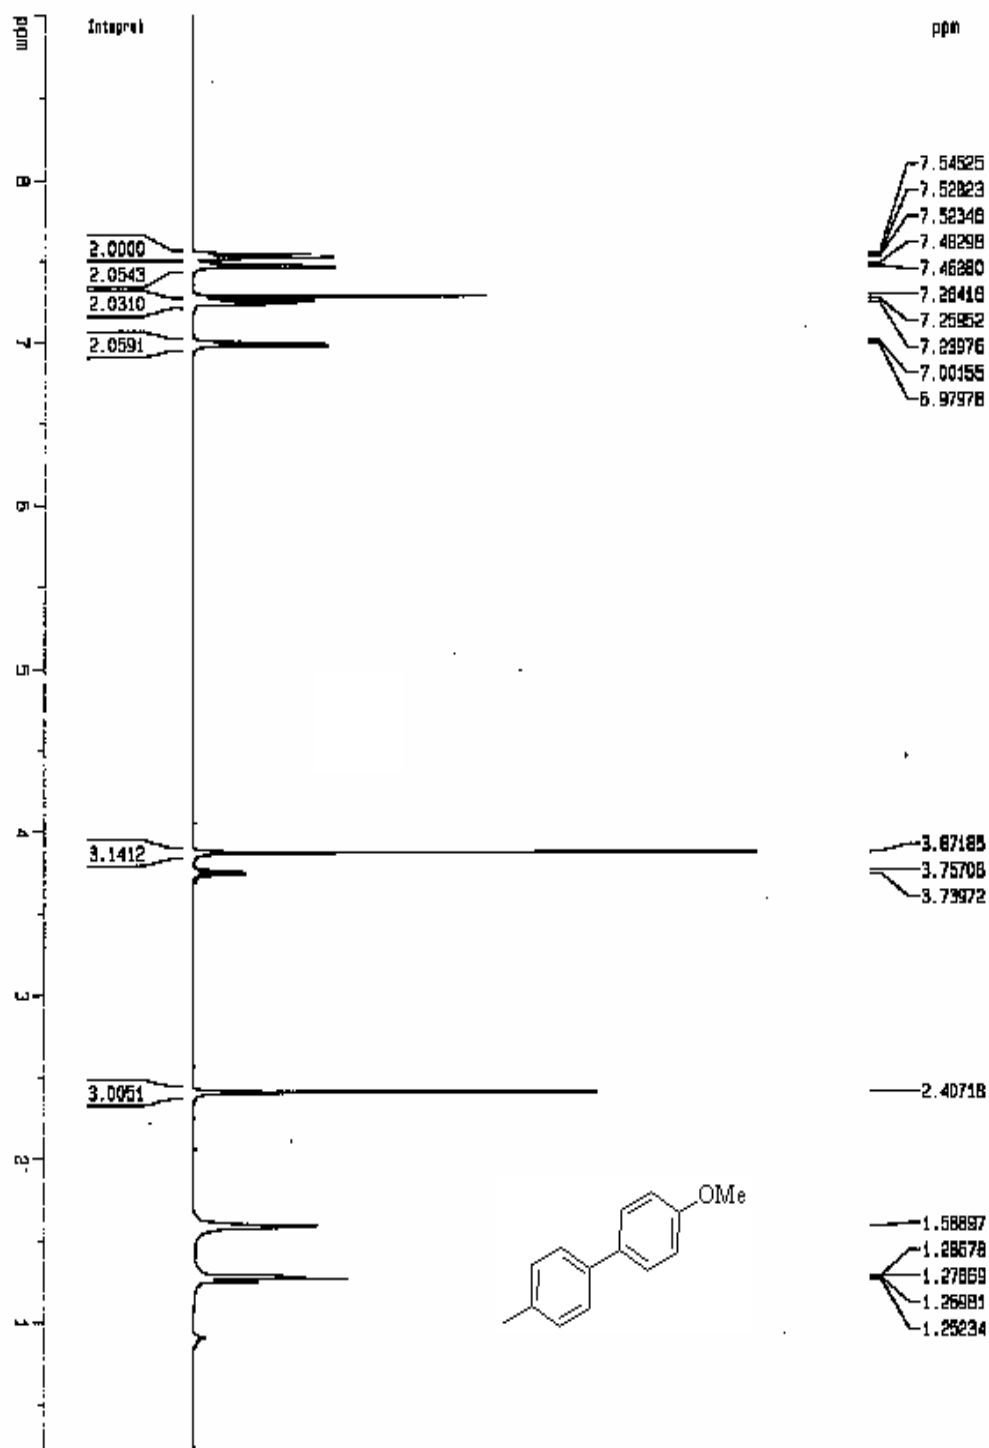

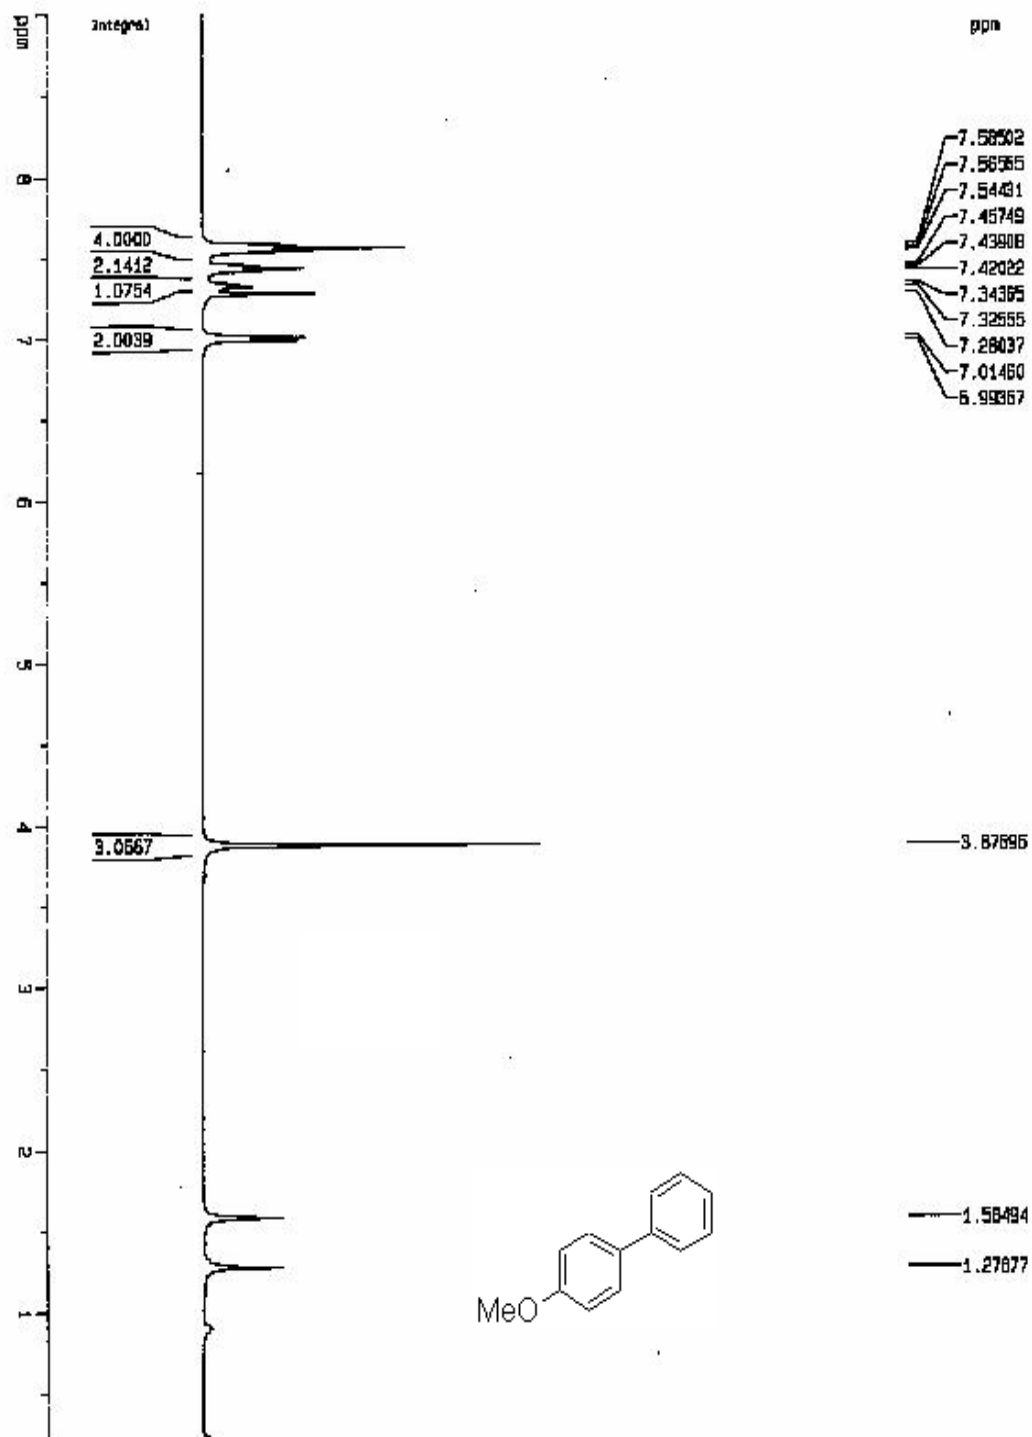

1H CDCl3 (44, JXG) BRUKER AV400 06.08.2011

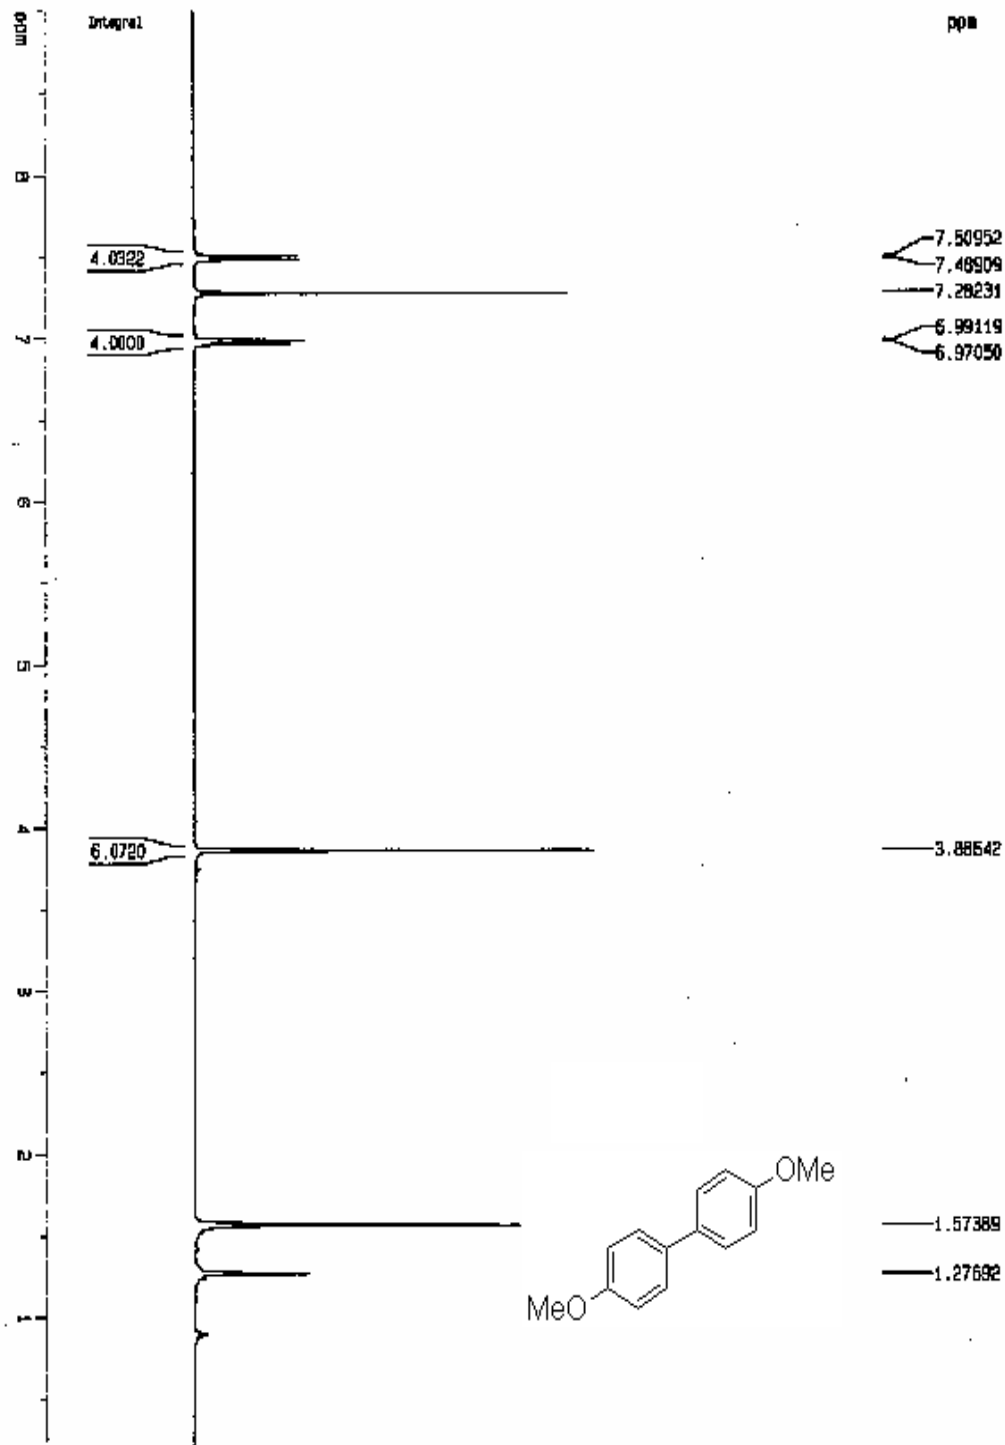

1H 400MHz (CDCl<sub>3</sub>) BRUKER AV400 06/08/2011

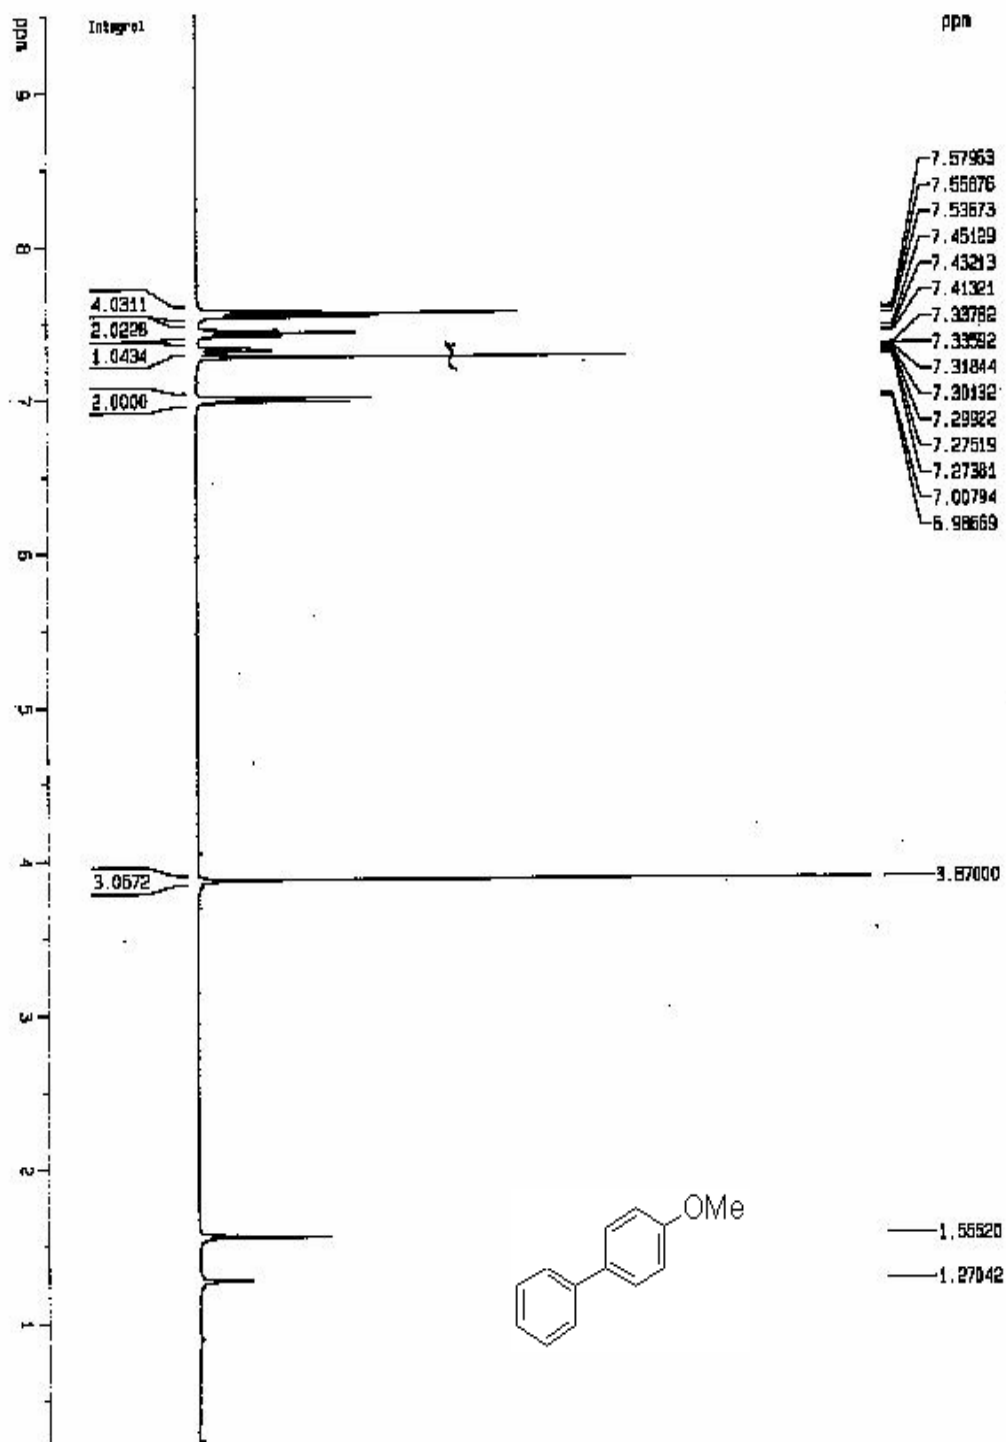

1H CDCl<sub>3</sub> (1%, JXQ) BRUKER AV400 05.01.2011

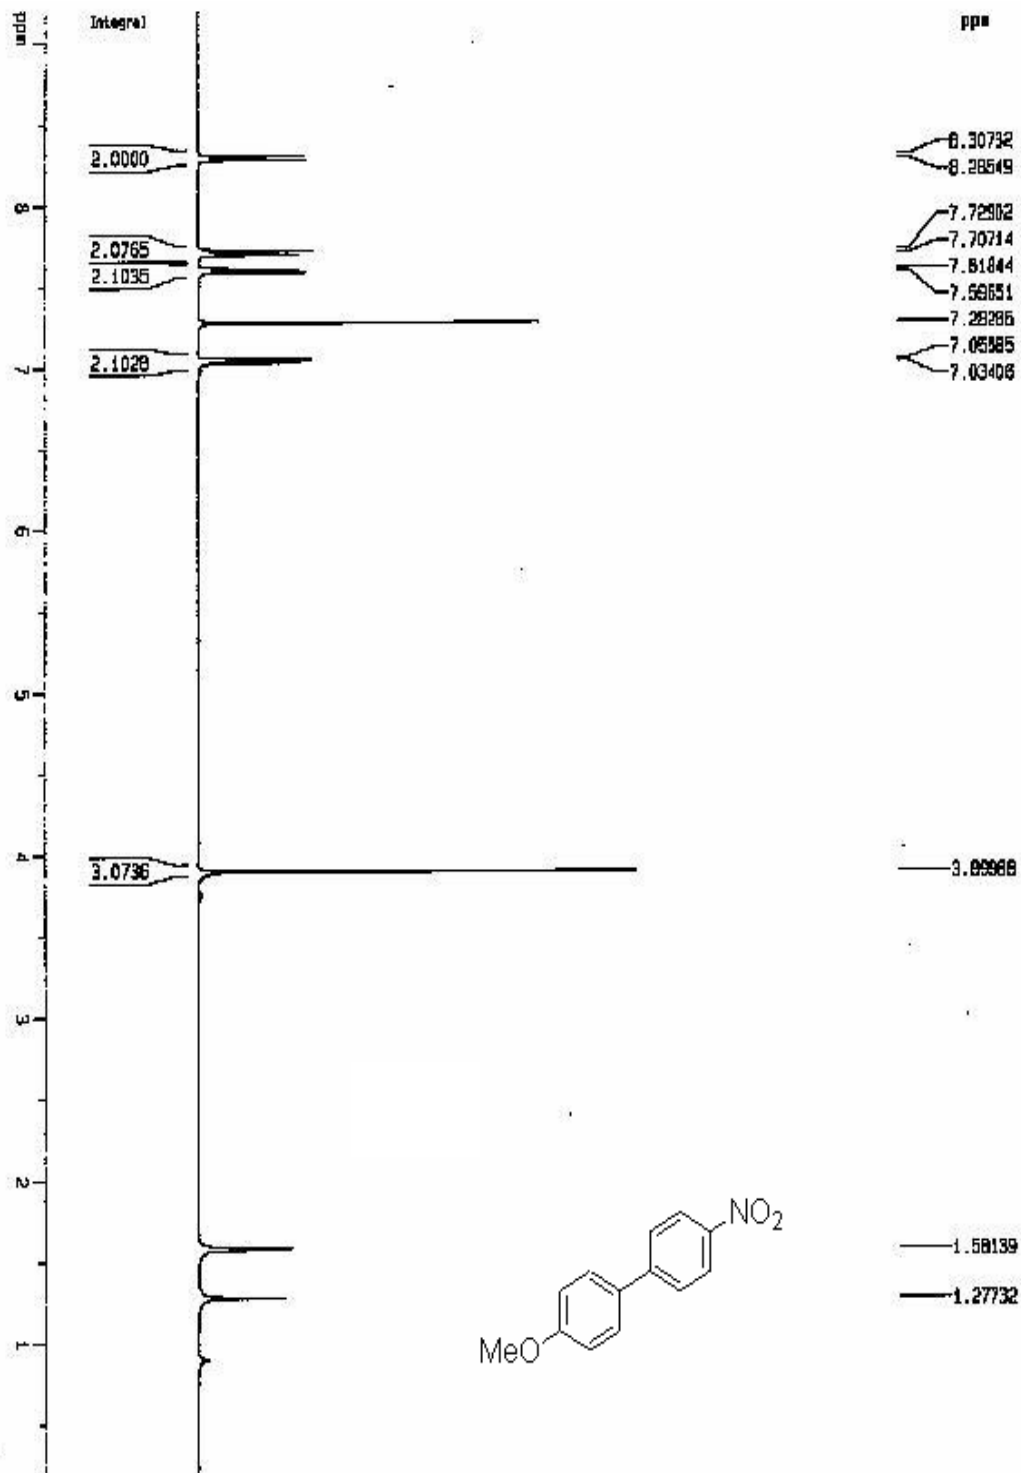

1H NMR (29, JNM) BRUKER AV400 06.08.2011

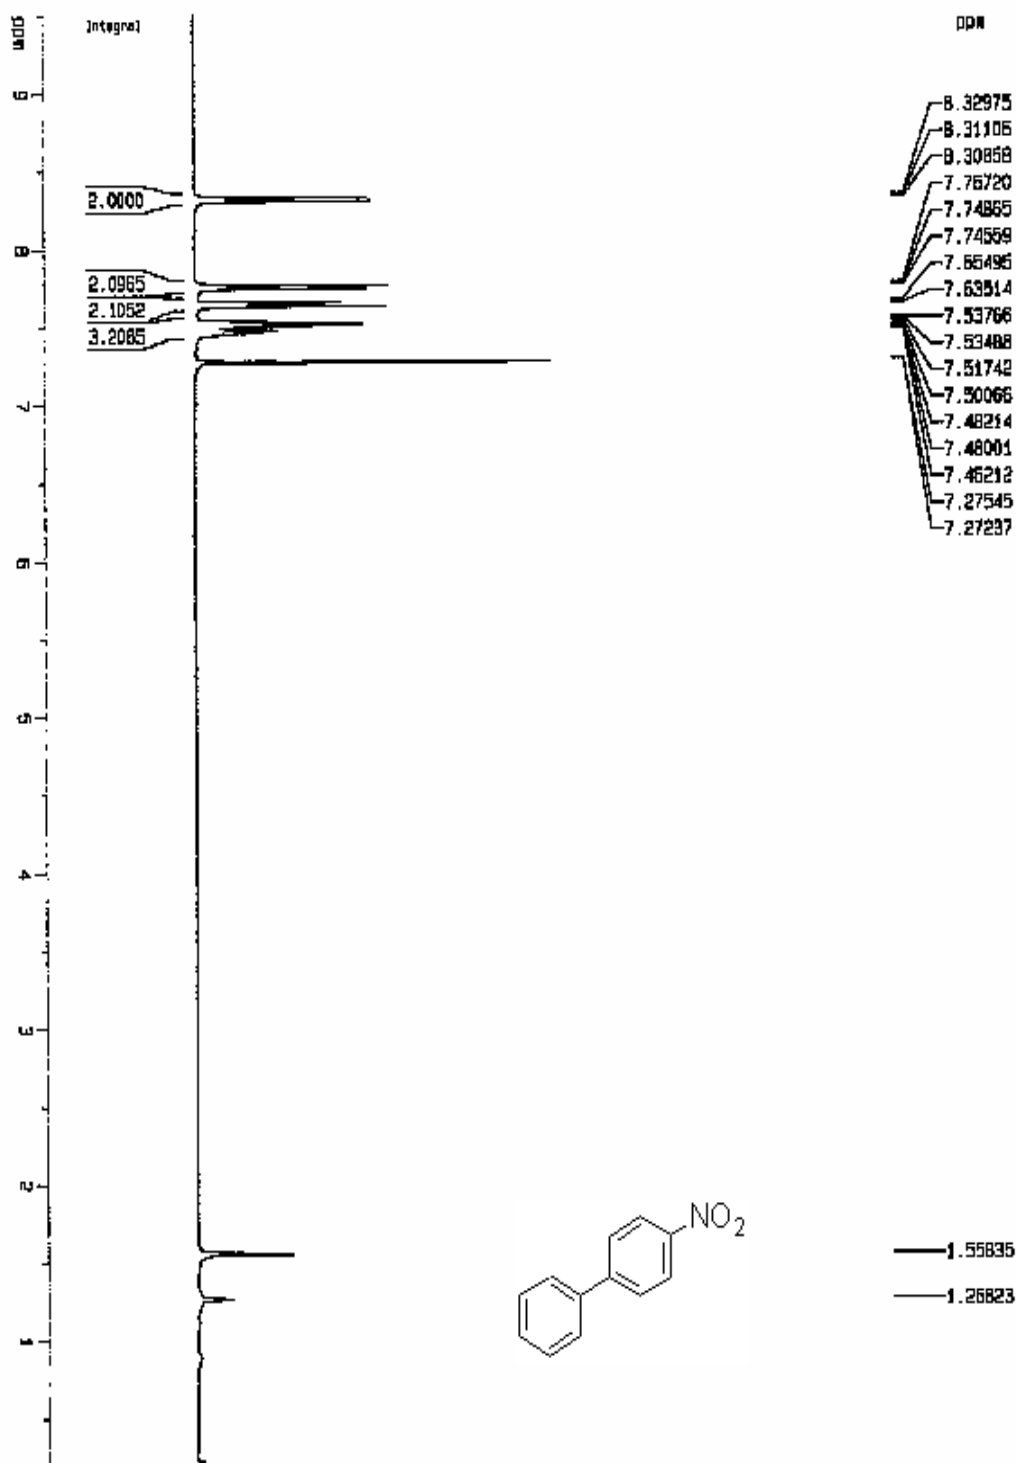



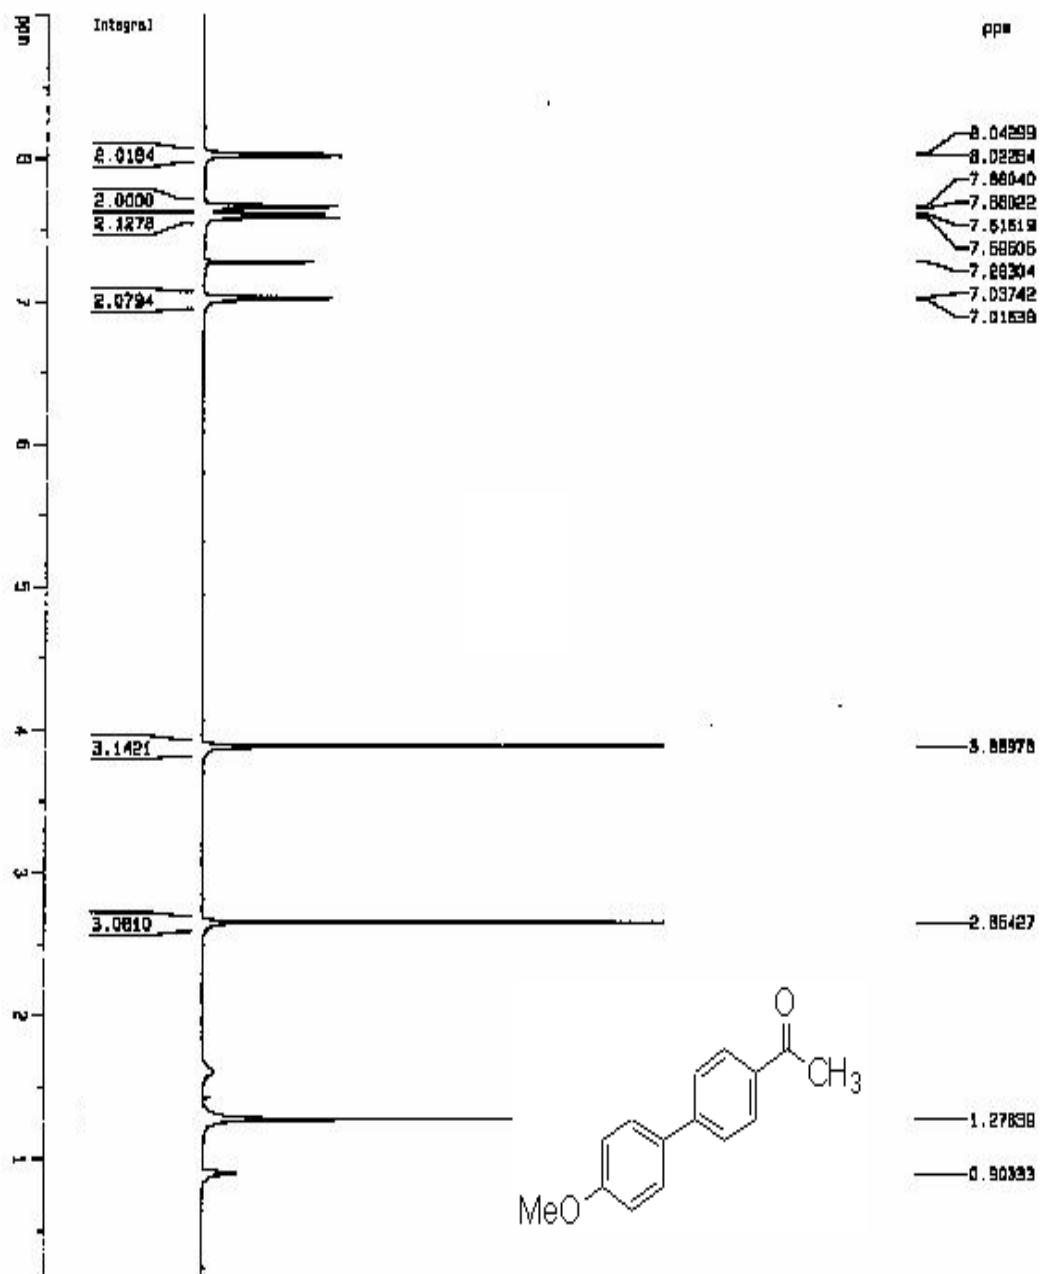

1H NMR (400 MHz, CDCl<sub>3</sub>) of 4-methoxyacetophenone, 17, 2011

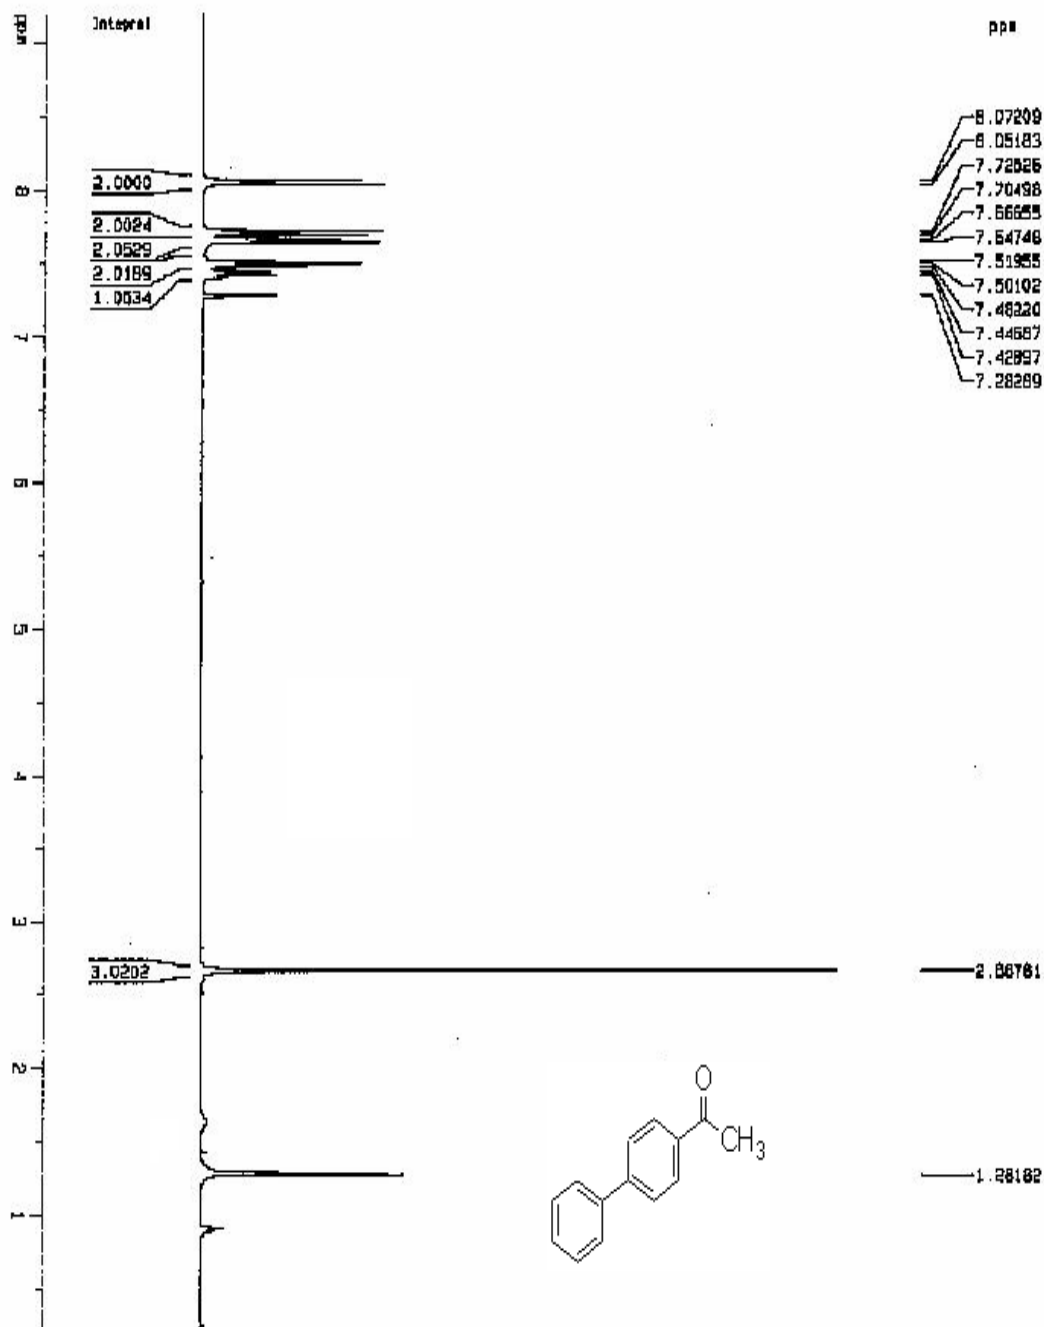

1H NMR (CDCl<sub>3</sub>, JMO) BRUKER AV400 05.17.2011

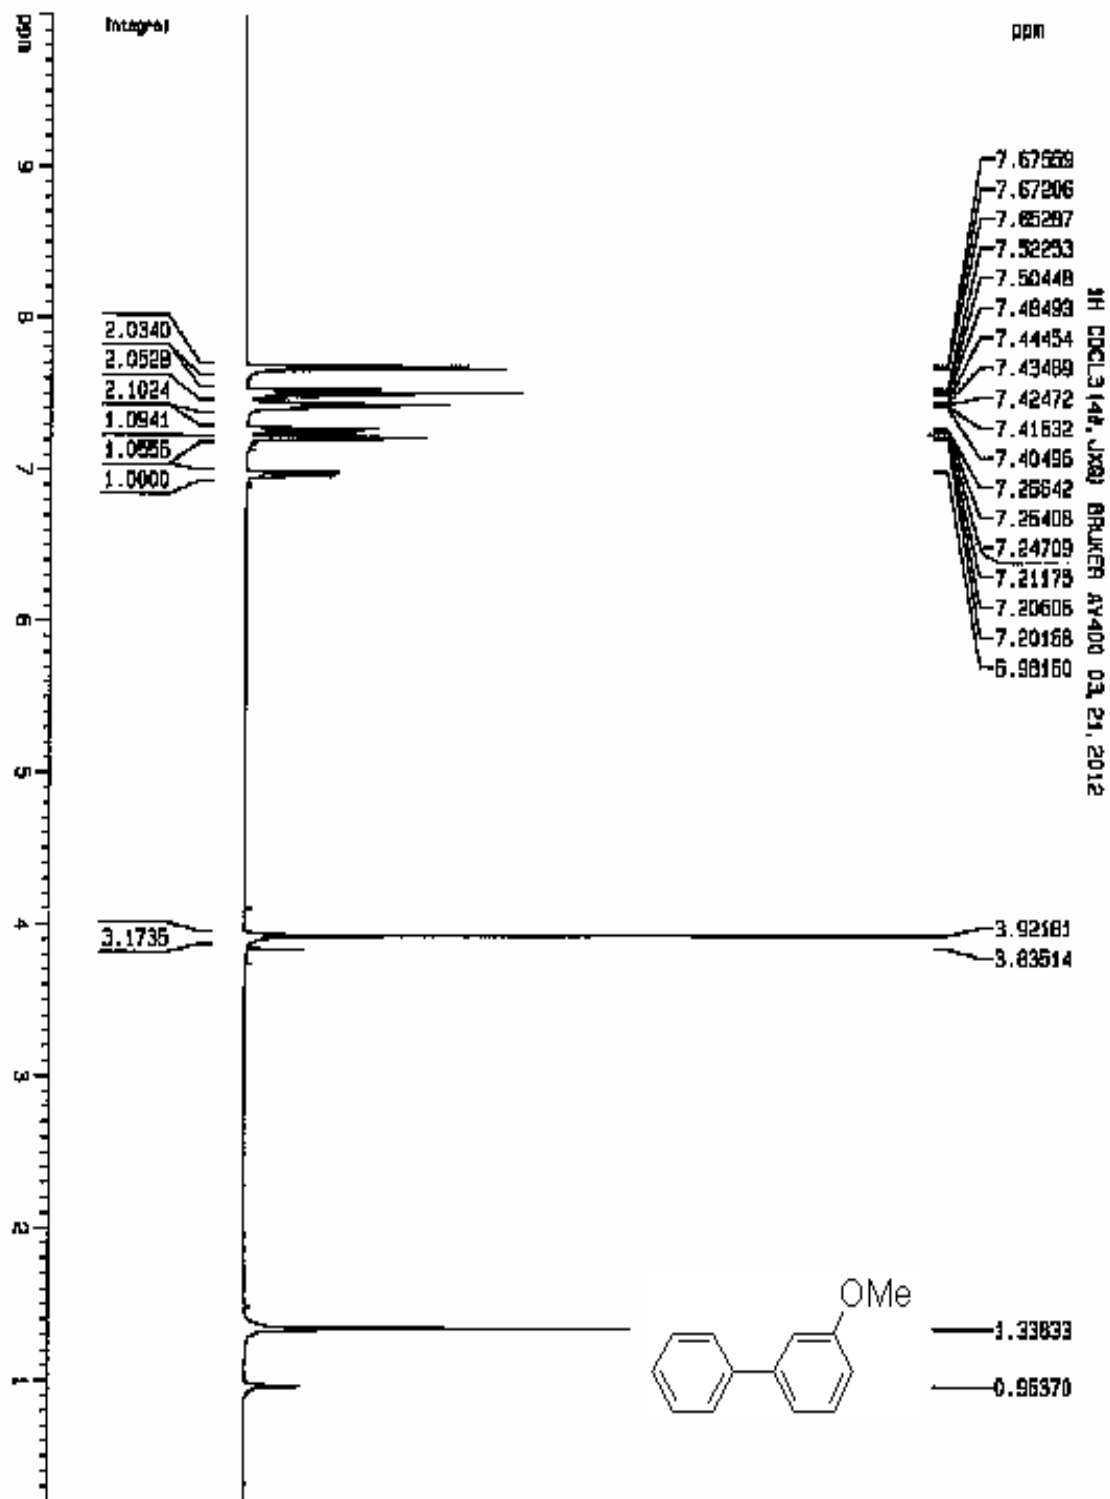

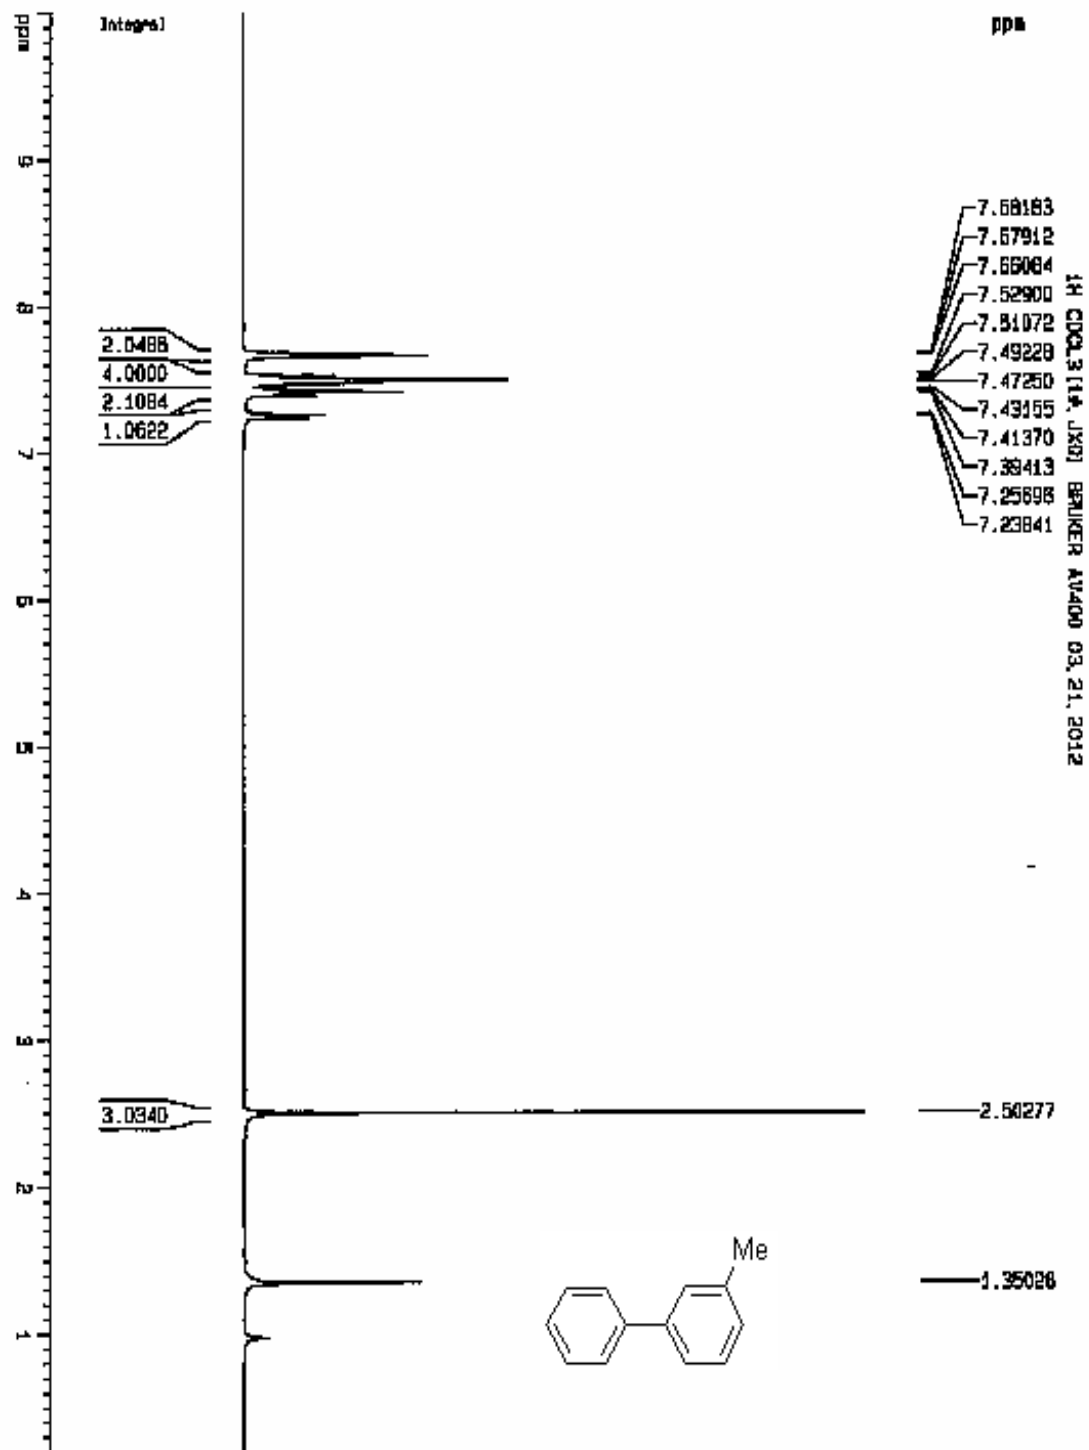

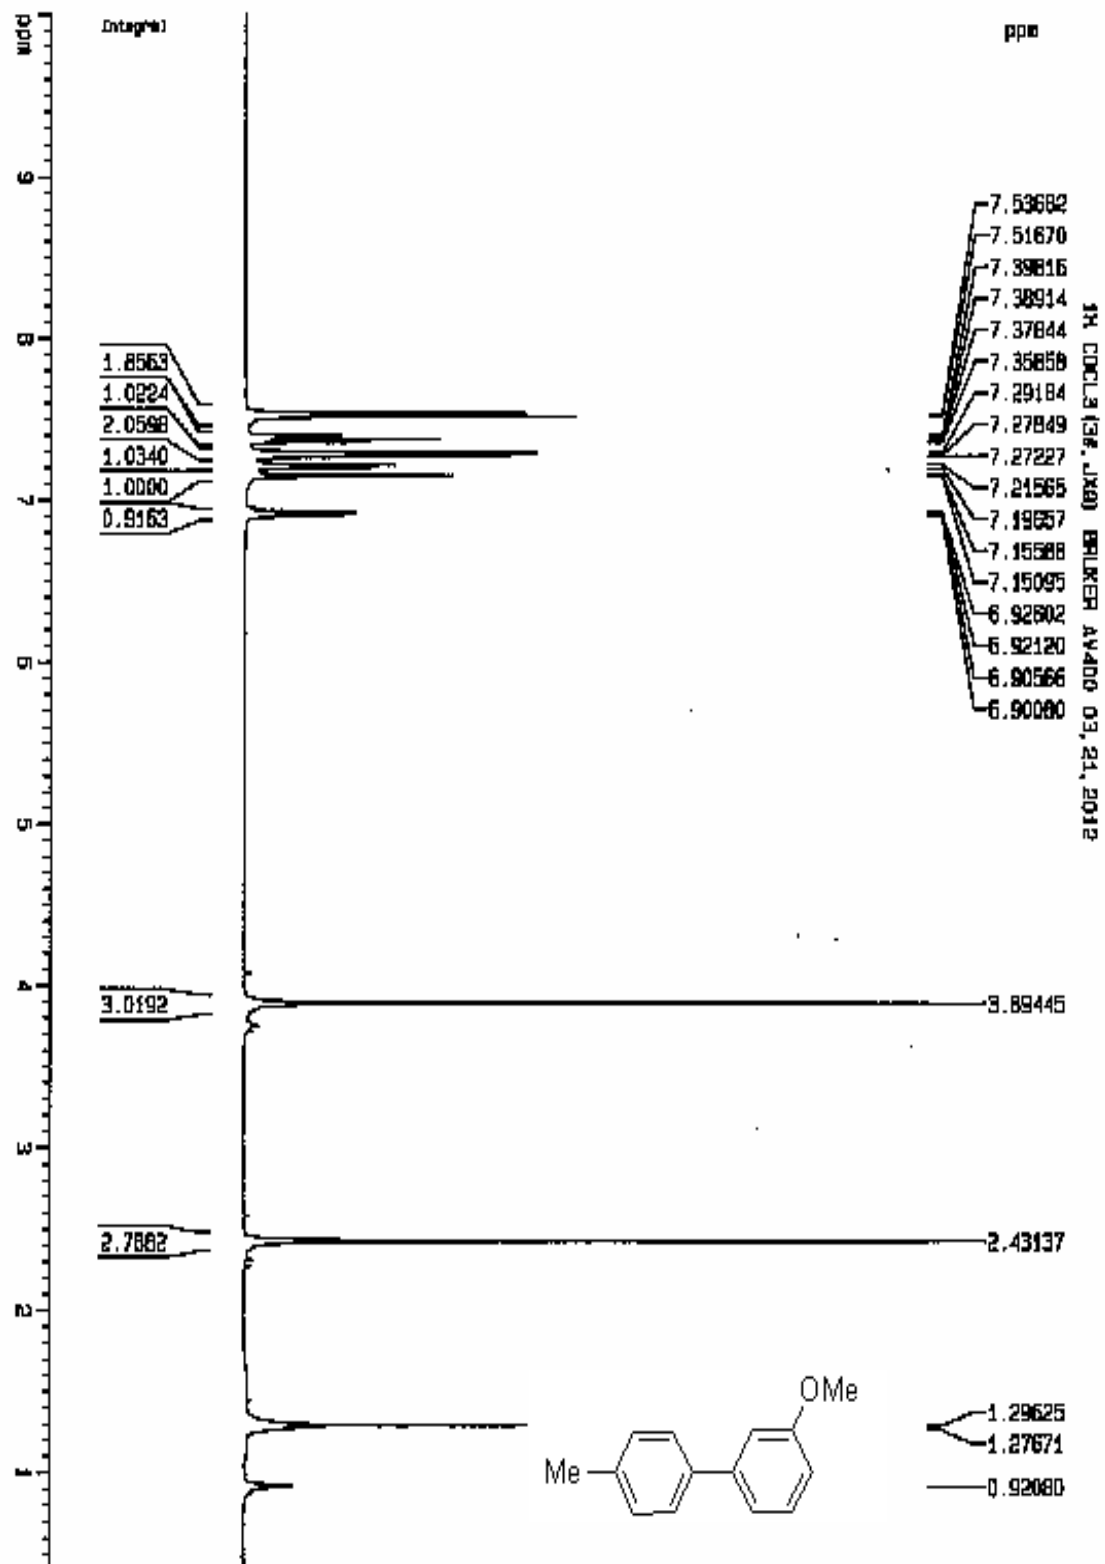

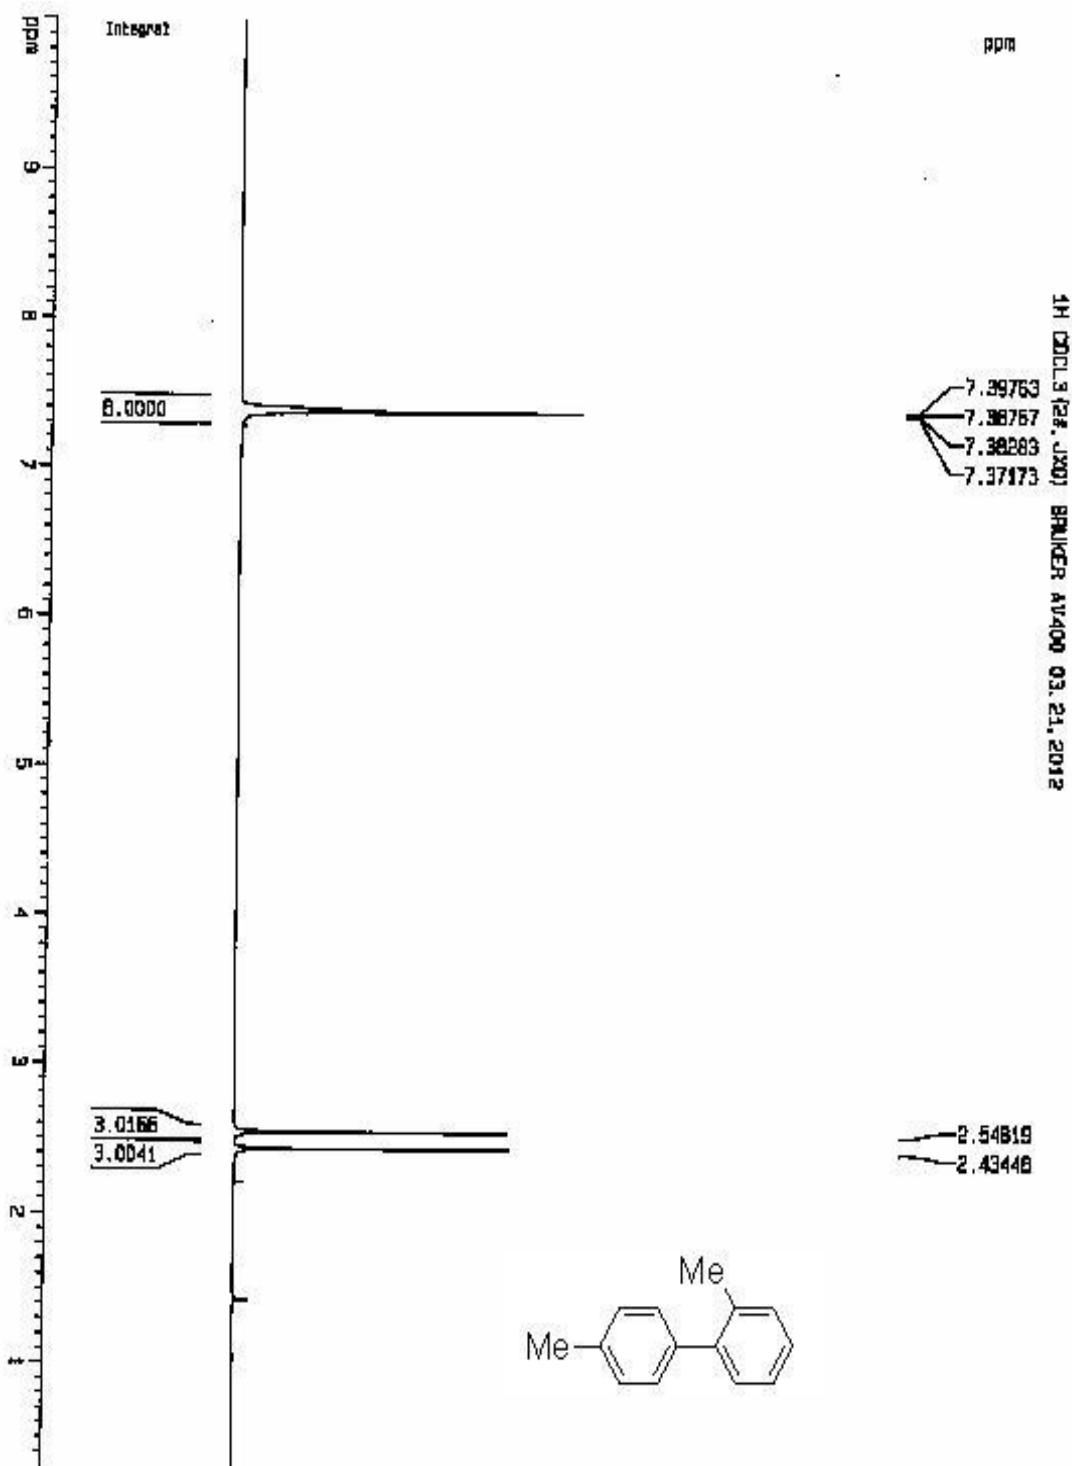

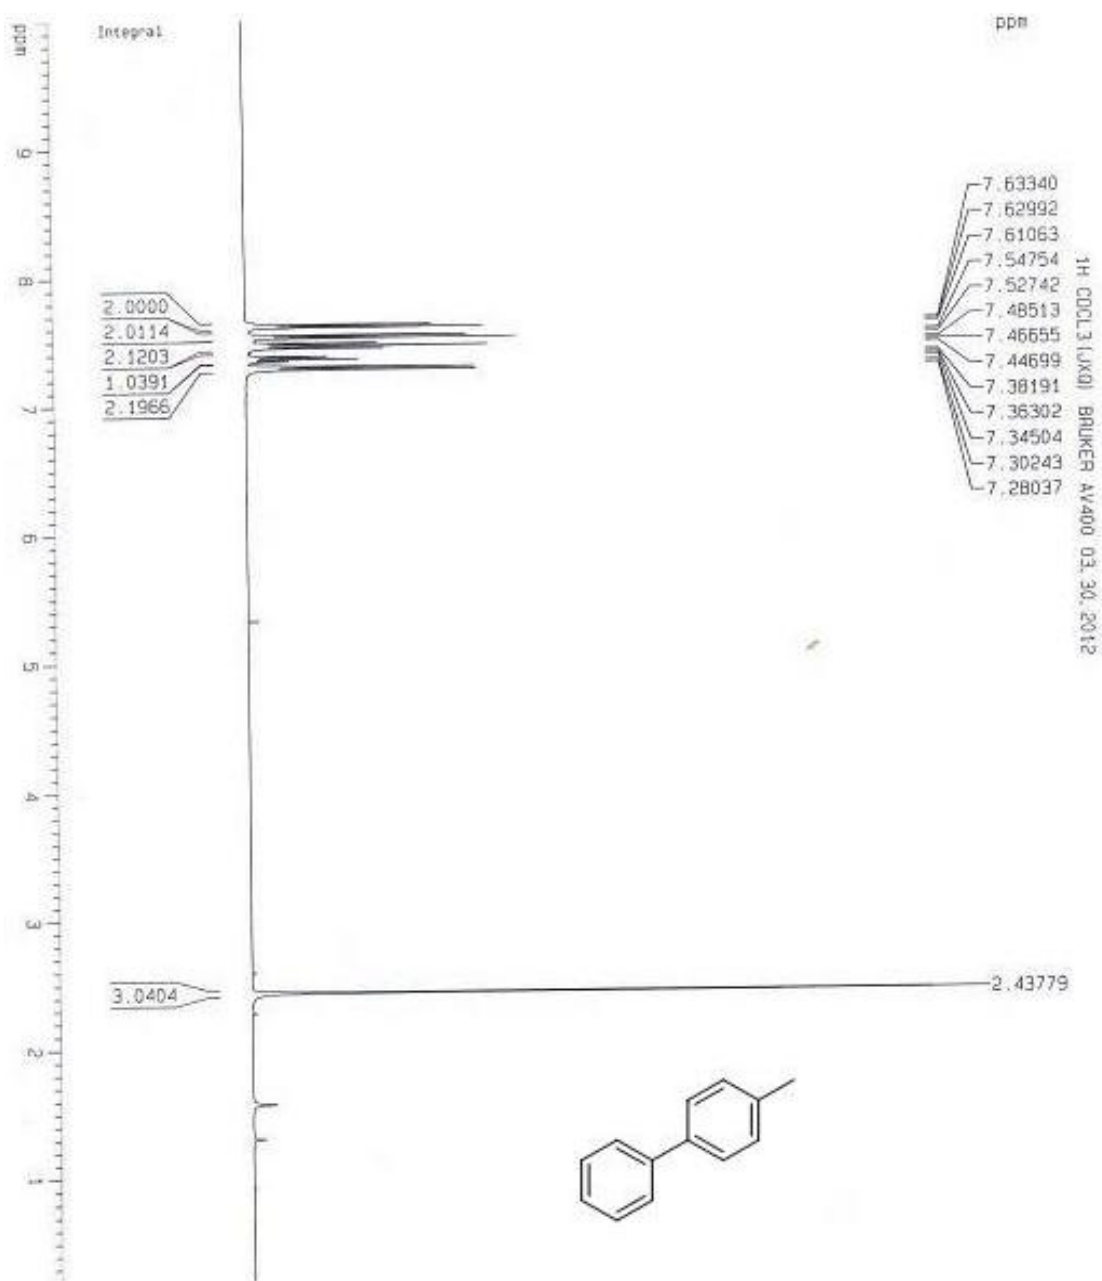

Supplement: c2cy20263h.pdf [file c2cy20263h.pdf]
